# Supplementary material
Source: ML conference proceedings conference paper supplement (https://proceedings.mlr.press/v54/mroueh17a.html)
Supplement: Supplementary file [file mroueh17a-supp.pdf]

# Co-Occuring Directions Sketching for Approximate Matrix Multiply : Supplementary Material

Youssef Mroueh

Etienne Marcheret

Vaibhava Goel

IBM T.J Watson Research Center, NY, USA.

## 1 Low Rank product Approximation

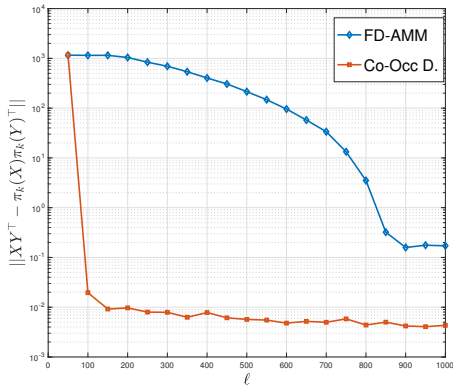

(a) ( $k_x = 400, k_y = 40$ )  
error in log scale.

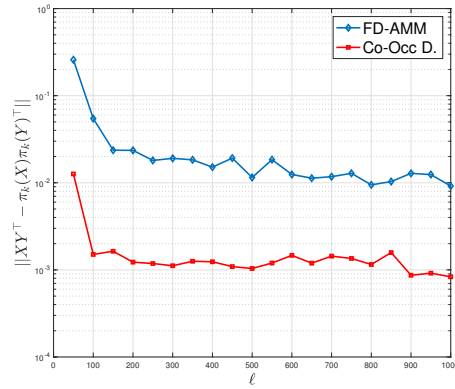

(b) ( $k_x = 40, k_y = 40$ )  
error in log scale.

Figure 1: No noise : Low rank approximation of matrix product, after projection on left and right singular vectors of  $B_X B_Y^T$  for  $k = \min(k_x, k_y) = 40$ .

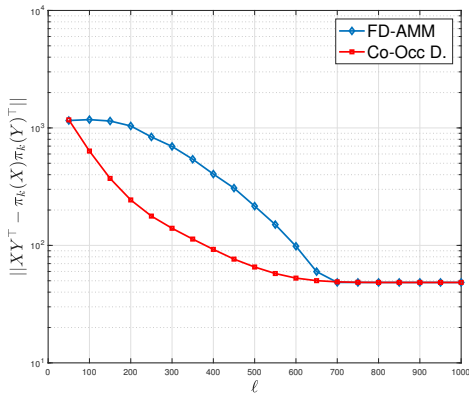

(a) ( $k_x = 400, k_y = 40$ )  
error in log scale.

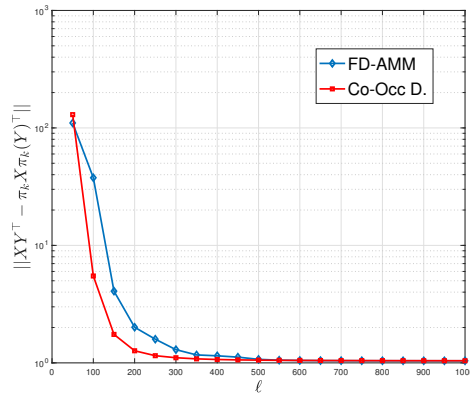

(b) ( $k_x = 40, k_y = 40$ )  
error in log scale.

Figure 2: Noisy : Low rank approximation of matrix product, after projection on left and right singular vectors of  $B_X B_Y^T$  for  $k = \min(k_x, k_y) = 40$ .

## 2 MS-Coco Timing Experiments

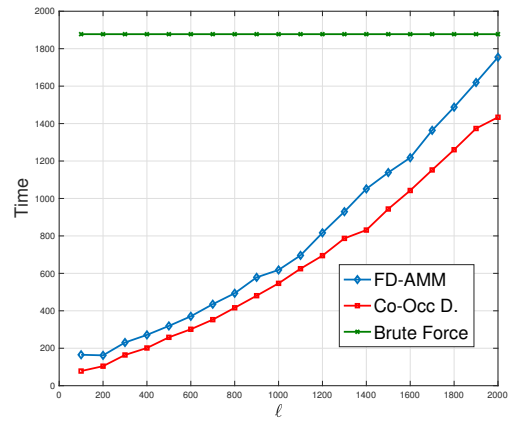

Figure 3: Timing of sketching on MS-COCO.
